# Supplementary material
Source: PubMed Central journal article supplement (PMC5577358)
Supplement: mmc1.pdf [file mmc1.pdf]

# Identifying Barriers to Delivering the Awakening and Breathing Coordination, Delirium, and Early Exercise/Mobility Bundle to Minimize Adverse Outcomes for Mechanically Ventilated Patients

## A Systematic Review

*Deena Kelly Costa, PhD, RN; Matthew R. White, BSN; Emily Ginier, MLIS; Milisa Manojlovich, PhD, RN, CCRN; Sushant Govindan, MD; Theodore J. Iwashyna, MD, PhD; and Anne E. Sales, PhD, RN*

CHEST 2017; 152(2):304-311

*Online supplements are not copyedited prior to posting and the author(s) take full responsibility for the accuracy of all data.*

**e-Appendix 1.****PubMed Search strategy keywords:**

("Intensive Care Units"[Mesh] OR "Intensive Care"[Mesh] OR ICU[tiab] OR ICUs[tiab] OR "intensive care"[tiab] OR "critical care"[tiab] OR "Critical Illness/rehabilitation"[MeSH] OR "Critical Illness/therapy"[MeSH]) AND (ABCDE[tiab] OR spontaneous awakening[tiab] OR ((awake\*[tiab] OR wake\*[tiab]) AND breath\*[tiab]) OR breathing trials[tiab] OR breathing trial[tiab] OR awakening trial[tiab] OR awakening trials[tiab] OR spontaneous breathing[tiab] OR (sedation[tiab] AND (interruption[tiab] OR vacation[tiab]))) OR "Delirium"[Mesh] OR deliri\*[tiab] OR "Early Ambulation"[Mesh] OR (early[tiab] AND (ambulation[tiab] OR mobilisation[tiab] OR mobility[tiab] OR mobilization[tiab] OR mobilizations[tiab] OR mobilized[tiab]))) OR exercise[tiab] OR exercises[tiab]) AND (barriers[tiab] OR barrier[tiab] OR issues[tiab] OR issue[tiab] OR problems[tiab] OR problem[tiab] OR hinder[tiab] OR hindered[tiab] OR hinders[tiab] OR perceptions[tiab] OR perception[tiab] OR behaviors[tiab] OR behavior[tiab] OR attitudes[tiab] OR attitude[tiab] OR facilitate[tiab] OR facilitates[tiab] OR facilitated[tiab] OR facilitator[tiab] OR facilitators[tiab] OR ease[tiab] OR easy[tiab] OR easier[tiab] OR difficult[tiab] OR difficulty[tiab] OR challenge[tiab] OR challenges[tiab] OR challenging[tiab]).

**e-Figure 1.** Barriers to ABCDE implementation categorized by the Consolidated Framework for Implementation Research (CFIR) as a guide.

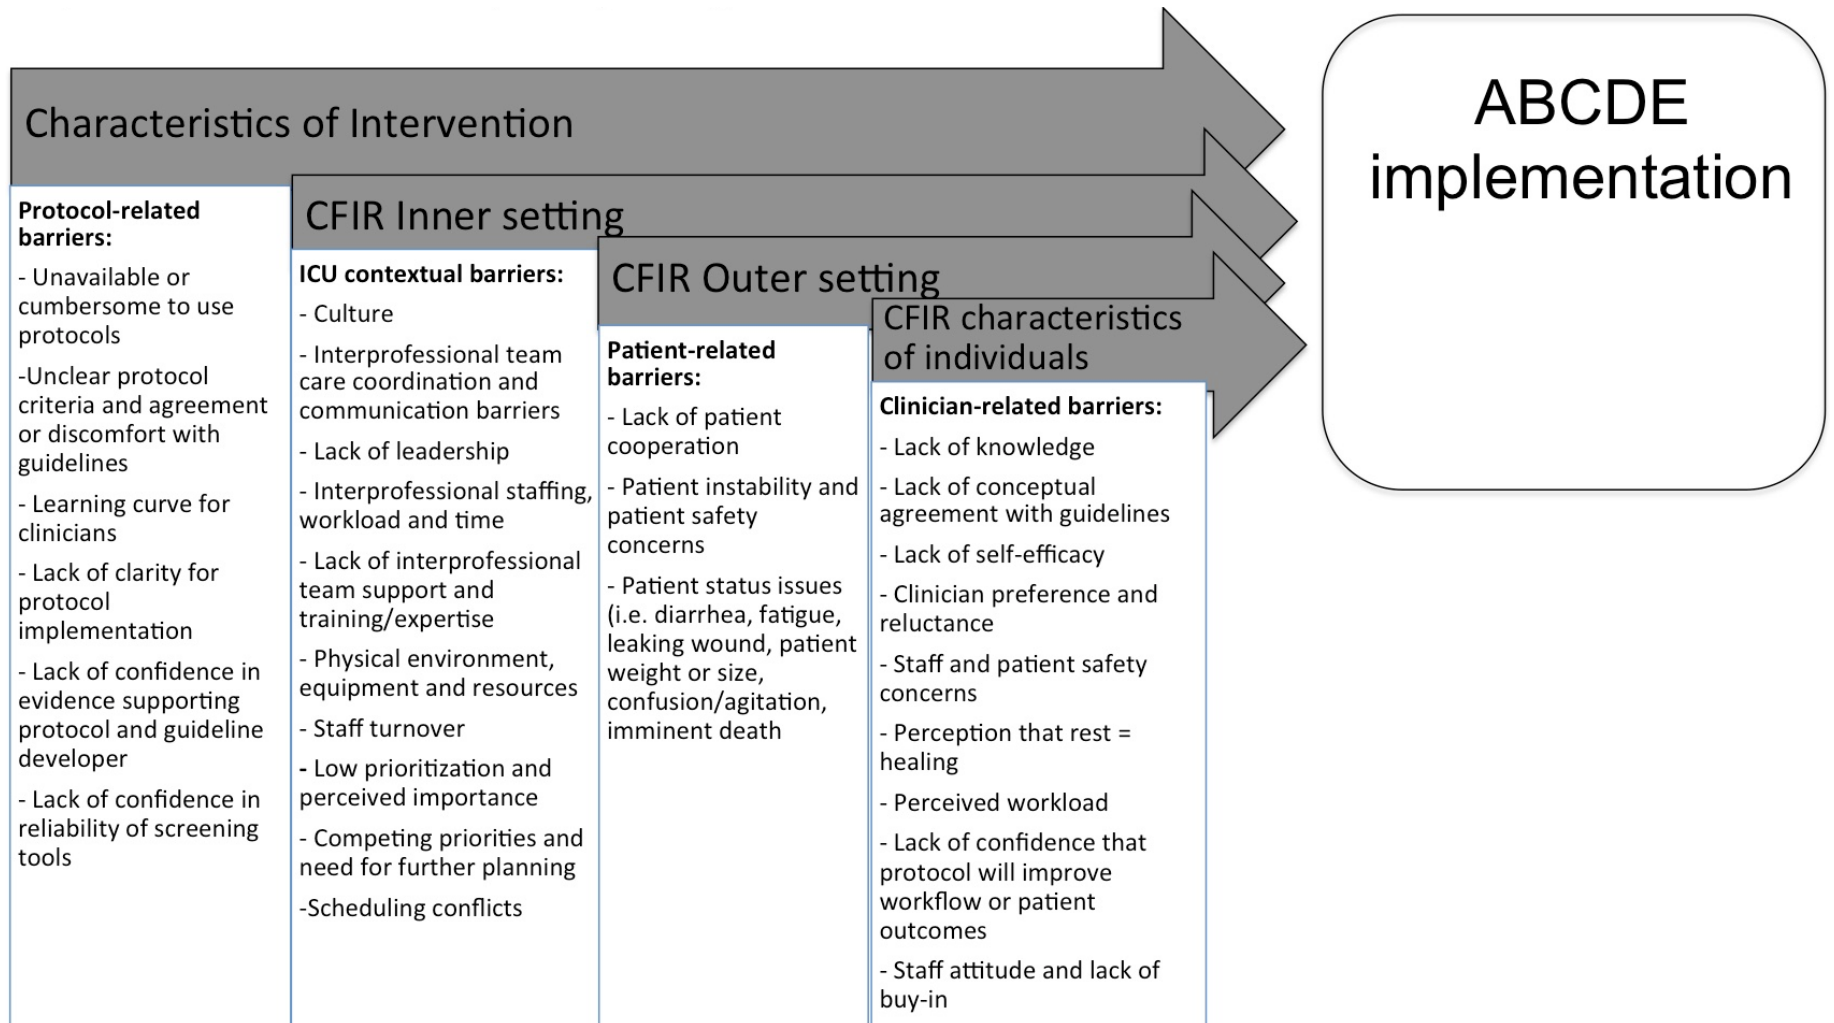

| <b>e-Table 1.</b> Included articles in this review                                |                                                                                                                                            |                          |
|-----------------------------------------------------------------------------------|--------------------------------------------------------------------------------------------------------------------------------------------|--------------------------|
| <b>AWAKENING, BREATHING COORDINATION, DELIRIUM AND EARLY MOBILITY (ABCDE) n=4</b> |                                                                                                                                            |                          |
| <i>Study Design</i>                                                               | <i>Title</i>                                                                                                                               | <i>Author</i>            |
| Qualitative                                                                       | Rethinking critical care: decreasing sedation, increasing delirium monitoring and increasing patient mobility                              | Bassett et al., (2015)   |
| Quantitative                                                                      | Clinical nurse specialist as change agent                                                                                                  | Reimers et al. (2014)    |
| Mixed methods                                                                     | Implementing the awakening and breathing coordination, delirium monitoring/management and early mobility bundle                            | Balas et al., (2013)     |
| Mixed methods                                                                     | Contextual issues influencing implementation and outcomes associated with an integrated approach to managing pain, agitation, and delirium | Carrothers et al. (2013) |
| <b>AWAKENING (A) &amp; DELIRIUM (D) n=1</b>                                       |                                                                                                                                            |                          |
| Mixed methods                                                                     | A pilot study to test the feasibility of a nonpharmacologic intervention for the prevention of delirium in the medical intensive care unit | Foster et al. (2013)     |
| <b>AWAKENING (A) and EARLY MOBILITY (E) n=1</b>                                   |                                                                                                                                            |                          |
| Quantitative                                                                      | Feasibility of physical and occupational therapy beginning from initiation of mechanical ventilation                                       | Pohlman et al. (2010)    |
| <b>AWAKENING (A) n=11</b>                                                         |                                                                                                                                            |                          |
| Qualitative                                                                       | A brief report of student research: protocol versus nursing practice – sedation vacation in a surgical intensive care unit                 | Joseph-Belfort (2009)    |
| Qualitative                                                                       | Implementation challenges in the intensive care unit: The why, who and how of daily interruption of sedation                               | Miller et al., (2012a)   |
| Qualitative                                                                       | What stops us from following sedation recommendations in intensive care units? A multicentric qualitative study                            | Sneyers et al. (2014a)   |
| Quantitative                                                                      | Implementation of a nurse-driven sedation protocol in the ICU                                                                              | Beck et al. (2008)       |
| Quantitative                                                                      | Perceived versus actual sedation practices in adult intensive care unit patients receiving mechanical ventilation                          | Gill et al. (2012)       |
| Quantitative                                                                      | Organisational characteristics associated with the use of daily interruption of sedation in US hospitals: a national study                 | Miller et al., (2012b)   |
| Quantitative                                                                      | Diverse attitudes to and understandings of spontaneous awakening trials: results from a statewide quality improvement collaborative        | Miller et al., (2013)    |

|                                |                                                                                                                                                                 |                                |
|--------------------------------|-----------------------------------------------------------------------------------------------------------------------------------------------------------------|--------------------------------|
| Quantitative                   | Current practices and barriers to impairing physicians' and nurses' adherence to analgo-sedation recommendations in the intensive care unit - a national survey | Sneyers et al. (2014b)         |
| Quantitative                   | Perceived barriers to the use of sedation protocols and daily sedation interruption: a multidisciplinary survey                                                 | Tanios et al. (2009)           |
| Mixed methods                  | Sedation management in Australian and New Zealand intensive care units: doctors' and nurses' practices and opinions                                             | O'Connor et al. (2010)         |
| Mixed methods                  | Predictors for daily interruption of sedation therapy by nurses: A prospective, multicenter study                                                               | Roberts et al. (2010)          |
| <b>DELIRIUM (D) n=10</b>       |                                                                                                                                                                 |                                |
| Qualitative                    | The experience of delirium care and clinical feasibility of the CAM-ICU in a Korean ICU                                                                         | Jung et al. (2013)             |
| Qualitative                    | Delirium assessment in intensive care units: practices and perceptions of Turkish nurses                                                                        | Ozsaban et al. (2015)          |
| Quantitative                   | Assessment of Delirium in the Intensive Care Unit: Nursing Practices and Perceptions                                                                            | Devlin et al. (2008)           |
| Quantitative                   | A questionnaire survey of critical care nurses' attitudes to delirium assessment before and after introduction of the CAM-ICU                                   | Eastwood et al. (2012)         |
| Quantitative                   | A survey of nurses' perceptions of the intensive care delirium screening checklist                                                                              | Law et al. (2012)              |
| Quantitative                   | Implementation of a validated delirium assessment tool in critically ill adults                                                                                 | Scott et al. (2013)            |
| Quantitative                   | Attitudes, knowledge and practice concerning delirium: A survey among intensive care unit professionals                                                         | Trogrlic' et al. (2016)        |
| Mixed methods                  | Nursing identification of delirium                                                                                                                              | Flagg et al. (2010)            |
| Mixed methods                  | Limitations and practicalities of CAM-ICU implementation, a delirium scoring system, in a Dutch intensive care unit                                             | Riekerk et al. (2009)          |
| Mixed methods                  | Implementation of a delirium assessment tool in the ICU can influence haloperidol use                                                                           | van den Boogaard et al. (2009) |
| <b>EARLY MOBILITY (E) n=22</b> |                                                                                                                                                                 |                                |
| Qualitative                    | Barriers and facilitators to early mobilization in intensive care: A qualitative study                                                                          | Barber et al., (2014)          |
| Qualitative                    | Integrating a multidisciplinary mobility programme into intensive care practice                                                                                 | Bassett et al. (2012)          |



|               |                                                                                                                                                               |                              |
|---------------|---------------------------------------------------------------------------------------------------------------------------------------------------------------|------------------------------|
| Qualitative   | Rehabilitation quality improvement in an intensive care unit setting: implementation of a quality improvement mode                                            | Needham et al. (2010)        |
| Qualitative   | Staff perceived barriers and facilitators                                                                                                                     | Winkelman et al.             |
| Qualitative   | Rehabilitation therapy and outcomes in acute respiratory failure: an observational pilot project                                                              | Zanni et al. (2010)          |
| Quantitative  | An environmental scan for early mobilization practices in U.S. ICUs                                                                                           | Bakhru et al. (2015)         |
| Quantitative  | ICU structure variation and implications for early mobilization practices: An international survey                                                            | Bakhru et al. (2016)         |
| Quantitative  | Safety and feasibility of an exercise approach to rehabilitation across the continuum of care for survivors of critical illness                               | Berney et al. (2012)         |
| Quantitative  | Early mobilization in critically ill patients: patients' mobilization level depends on health care provider's profession                                      | Garzon-Serrano et al. (2011) |
| Quantitative  | Medical intensive care unit clinician attitudes and perceived barriers towards early mobilization of critically ill patients: a cross-sectional survey        | Jolley et al. (2014)         |
| Quantitative  | What are the barriers to mobilizing intensive care patients?                                                                                                  | Leditschke et al.,           |
| Quantitative  | Physical therapist practice in the intensive care unit: Results of a national survey                                                                          | Malone et al. (2015)         |
| Quantitative  | Factors associated with timing of initiation of physical therapy in patients with acute lung injury                                                           | Mendez-Tellez et al., (2013) |
| Quantitative  | Early mobilization of mechanically ventilated patients: a 1-day point-prevalence study in Germany                                                             | Nydahl et al. (2014)         |
| Mixed methods | Rehabilitation within Scottish intensive care units: A national survey                                                                                        | Appleton et al., (2011)      |
| Mixed methods | Early mobilization: Changing the mindset                                                                                                                      | Castro et al. (2015)         |
| Mixed methods | Overcoming barriers to the mobilisation of patients in an intensive care unit                                                                                 | Dafoe et al. (2015)          |
| Mixed methods | ICU early mobilization: from recommendation to implementation at three medical centers                                                                        | Engel et al. (2013)          |
| Mixed methods | Physical therapy-driven quality improvement to promote early mobility in the intensive care unit                                                              | Harris et al. (2014)         |
| Mixed methods | Early mobilisation in intensive care units in Australia and Scotland: A prospective, observational cohort study examining mobilisation practices and barriers | Harrold et al. (2015)        |
| Mixed methods | Mobilization of ventilated patients in the intensive care unit: An elicitation study using the theory of planned behavior                                     | Holdsworth et al. (2015)     |
| Mixed methods | Benchmarking rehabilitation practice in the intensive care unit                                                                                               | Knott et al. (2015)          |

**e-Table 2.** Identified barriers from the literature (n=107)

|                                                                                                           |                                                                                                                    |                                                                                                            |
|-----------------------------------------------------------------------------------------------------------|--------------------------------------------------------------------------------------------------------------------|------------------------------------------------------------------------------------------------------------|
| Belief that performing SATs is hard work                                                                  | Interprofessional communication                                                                                    | Lack of staffing, equipment and resources                                                                  |
| Care coordination challenges                                                                              | Lack of acceptance of bundle                                                                                       | Lack of support from interprofessional team                                                                |
| Clarification of protocol criteria                                                                        | Lack of applicability to practice population                                                                       | Lack of support from leadership and physicians                                                             |
| Clinician preference for care                                                                             | Lack of awareness (Inability to correctly acknowledge guidelines existence)                                        | Logistics (middle managers, leaders and local referents, IT, checklists, reminders, educational materials) |
| Clinician preference for more autonomy than protocol offers                                               | Lack of clinician acceptance to protocol                                                                           | Method ambiguity (lack of clarity on how to complete steps)                                                |
| Clinician staffing & workload                                                                             | Lack of conceptual agreement with guidelines                                                                       | No shared understanding about why DIS should be done or who should be excluded from DIS                    |
| Communication                                                                                             | Lack of confidence in ability to complete protocol or ability to use protocol                                      | Organizational characteristics (culture, teamwork, communication)                                          |
| Compatibility of guideline characteristics (consistency of guideline with clinician values, norms, needs) | Lack of confidence that executive recommendation will succeed in improving nursing workflow or working preferences | Organizational constraints                                                                                 |
| Cost                                                                                                      | Lack of confidence that executing recommendation will achieve beneficial patient outcomes                          | Patient cooperation or patient refusal                                                                     |
| Culture                                                                                                   | Lack of consensus on goals of DIS                                                                                  | Patient/family consent process                                                                             |
| Difficult to use protocols                                                                                | Lack of effective project leadership                                                                               | Perceived pain and discomfort                                                                              |
| Documentation deficiencies                                                                                | Lack of equipment and resources                                                                                    | Perceived reluctance to follow protocols                                                                   |
| Exception ambiguity (lack of clarity on when executing has no advantage or is contraindicated)            | Lack of familiarity (inability to correctly answer questions about guidelines content)                             | Perception that protocol offered no benefit to patients                                                    |
| Expectation ambiguity (lack of clarity on expected standards or norms regarding compliance)               | Lack of feedback on performance                                                                                    | Physical environment                                                                                       |
| Expectation of nurse                                                                                      | Lack of knowledge about protocol, contraindications                                                                | Physiological patient issues (deep sedation, agitated, contraindications for bundle)                       |
| Fear of comprised patient safety                                                                          | Lack of knowledge re: goals of DIS                                                                                 | Poor outcomes expectancy                                                                                   |



|                                                                                   |                                                                                |                                                                               |
|-----------------------------------------------------------------------------------|--------------------------------------------------------------------------------|-------------------------------------------------------------------------------|
| Fear of oversimplification & limitation of clinical judgment                      | Lack of knowledge related to training, purpose of bundle and its impact        | Poor strength of evidence & poor confidence in guideline developer            |
| Feeling it is unethical not to sedate ICU patients; perceived harm                | Lack of leadership                                                             | Previous execution associated with negative outcomes                          |
| Inconsistent support and orders from physicians                                   | Lack of leadership driving safety culture                                      | Protocol cumbersome to use or difficult to use                                |
| Inertia/lack of motivation to change practice                                     | Lack of management support for infrastructure needed                           | Protocol development is lengthy                                               |
| Insufficient funding and equipment                                                | Lack of patient cooperation                                                    | Protocol not appropriate for select patients                                  |
| Insufficient knowledge                                                            | Lack of physician referrals                                                    | Protocols not accessible                                                      |
| Interprofessional care coordination barriers                                      | Lack of self-efficacy                                                          | Reduced autonomy and/or self-respect                                          |
| Resistance to change                                                              | Responsibility ambiguity (lack of clarity as to who is responsible)            | Sleep promotion                                                               |
| Task ambiguity (lack of info about what tasks have been completed vs. incomplete) | Task characteristics                                                           | Staff safety concerns                                                         |
| Time constraints                                                                  | Tool not available                                                             | Treatment related adverse events                                              |
| Trialability – possibility for clinician to test guideline with relative ease     | Unavailability of interprofessional staff                                      | Unit culture                                                                  |
| Work load                                                                         | Perception that rest equals healing                                            | Competing priorities                                                          |
| Lack of buy-in                                                                    | Patient weight or size                                                         | Poor nurse-physician collaboration                                            |
| Uncomfortable with guideline used                                                 | Need for further planning                                                      | Fear of patient off sedation                                                  |
| Thinking that perfect protocols needed to start                                   | Challenge maintaining engagement of rounding physicians                        | Lack of prioritization of challenges to align necessary improvement resources |
| Staff turnover                                                                    | Staff attitude                                                                 | Safety of tubes, catheters, lines and wires                                   |
| Imminent death                                                                    | Lower prioritization, value and perceived importance                           | Patient issues (diarrhea, fatigue, leaking wound)                             |
| PT expertise/inadequate training                                                  | Confusion/agitation                                                            | Lack of consultation criteria                                                 |
| Belief that delirium is not preventable                                           | Scheduling conflicts (patient off unit, dialysis, procedure, transfer to ward) | Lack of trust or confidence in reliability of screening tools                 |
| Low uniformity with guidelines                                                    | Low satisfaction with physician management                                     |                                                                               |
